# Supplementary material for: A density functional theory analysis of the C–H activation reactivity of iron(iv)-oxo complexes with an ‘O’ substituted tetramethylcyclam macrocycle
Source: Royal Society of Chemistry journal article supplement (doi:10.1039/d4dt00063c), 2024-01-01
Supplement: d4dt00063c1.pdf [file d4dt00063c1.pdf]

## A Density Functional Theory Analysis of the C-H Activation Reactivity of Iron(IV)-Oxo complexes with 'O' Substituted Tetramethyl-cyclam Macrocycle

Lovleen Kaur and Debasish Mandal\*

School of Chemistry and Biochemistry, Thapar Institute of Engineering and Technology,  
Patiala-147004, Punjab, India

Corresponding author: [debasish.mandal@thapar.edu](mailto:debasish.mandal@thapar.edu)

| S. No. | CONTENTS                                                                                                                           | NO. |
|--------|------------------------------------------------------------------------------------------------------------------------------------|-----|
| 1      | Full citation of Gaussian 16                                                                                                       | S1  |
| 2      | Figure S1. Spin Natural orbitals and their occupations in transition states for quintet TS .                                       | S2  |
| 3      | Table S1. Relative energies (in kcal mol <sup>-1</sup> ) of oxidants, TS and intermediates computed at different levels of theory. | S3  |
| 4      | Table S2. Calculated LUMO energies for quintet states.                                                                             | S4  |
| 5      | Table S3. Calculated distortion energies for quintet states.                                                                       | S4  |
| 6      | Table S4. Spin densities and spin charges for oxidants.                                                                            | S4  |
| 7      | Table S5. Spin densities and spin charges for TS and intermediates.                                                                | S5  |
| 8      | Table S6. Stability constants for the complexes                                                                                    | S5  |
| 9      | Table S7. Spin state gaps using different functionals                                                                              | S5  |
| 10     | Cartesian coordinates of optimized geometries of stationary points.                                                                | S6  |

**Full citation of Gaussian 16:** *Gaussian 16*, Revision B.01, Frisch, M.J., Trucks, G.W., Schlegel, H.B., Scuseria, G.E., Robb, M.A., Cheeseman, J.R.; Scalmani, G.; Barone, V.; Petersson, G.A.; Nakatsuji, H.; Li, X.; Caricato, M.; Marenich, A.V.; Bloino, J., Janesko, B.G., Gomperts, R., Mennucci, B., Hratchian, H.P., Ortiz, J.V., Izmaylov, A.F., Sonnenberg, J.L., Williams-Young, D., Ding, F., Lipparini, F., Egidi, F., Goings, J., Peng, B., Petrone, A., Henderson, T., Ranasinghe, D., Zakrzewski, V.G., Gao, J., Rega, N., Zheng, G., Liang, W., Hada, M., Ehara, M., Toyota, K., Fukuda, R., Hasegawa, J., Ishida, M., Nakajima, T., Honda, Y., Kitao, O., Nakai, H., Vreven, T., Throssell, K., Montgomery Jr., J.A., Peralta, J.E., Ogliaro, F., Bearpark, M.J., Heyd, J.J., Brothers, E.N., Kudin, K.N., Staroverov, V.N., Keith, T.A., Kobayashi, R., Normand, J., Raghavachari, K., Rendell, A.P., Burant, J.C., Iyengar, S.S., Tomasi, J., Cossi, M., Millam, J.M., Klene, M., Adamo, C., Cammi, R., Ochterski, J.W., Martin, R.L., Morokuma, K., Farkas, O., Foresman, J.B., Fox, D.J. Gaussian, Inc., Wallingford CT (2016) Wallingford, E.U.A.

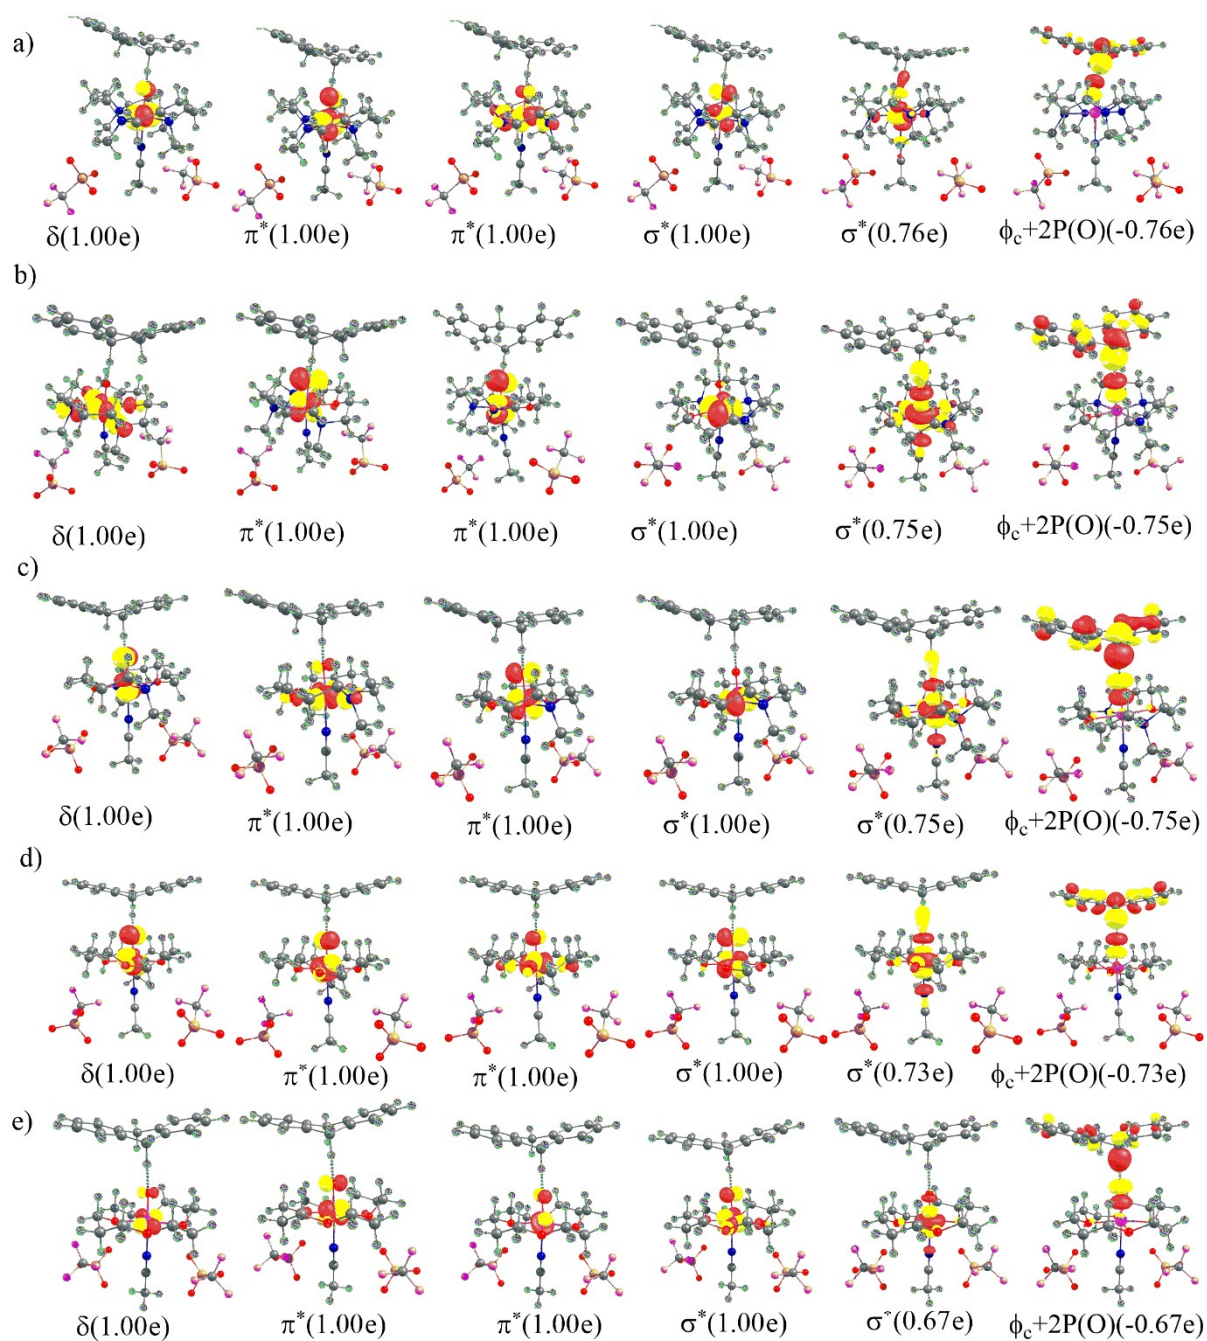

**Figure S1.** Spin Natural orbitals and their occupations in transition states for  $^5TS$  of a)  $N_4$  b)  $N_3O_1$  c)  $N_2O_2$  (d)  $NO_3$  and e)  $O_4$  framework

**Table S1.** Relative energies (in kcal mol<sup>-1</sup>) of oxidants, TS and intermediates computed at different levels of theory where B1 is 6-31G\*/LANL2DZ(Fe) and B2 is Def2tzvpp and B3 is 6-311++G(2d,2p)/SDD(Fe).

| Reactions | Spin State | Species          | B1 + ZPE | B2 +ZPE | G <sub>298K</sub> (B2) | B3 + ZPE | G <sub>298K</sub> (B3) |
|-----------|------------|------------------|----------|---------|------------------------|----------|------------------------|
| N4        | S=1        | <sup>3</sup> R+S | 0.0      | 0.0     | 0.0                    | 0.0      | 0.3                    |
|           |            | <sup>3</sup> TS  | 25.9     | 21.7    | 34.5                   | 20.2     | 33.2                   |
|           |            | <sup>3</sup> IH  | 1.2      | -8.6    | 1.1                    | -6.2     | 3.0                    |
|           | S=2        | <sup>5</sup> R+S | 5.5      | 2.1     | 1.1                    | 0.7      | 0.0                    |
|           |            | <sup>5</sup> TS  | 19.0     | 12.8    | 23.1                   | 9.0      | 20.9                   |
|           |            | <sup>5</sup> IH  | 1.8      | -14.6   | -5.0                   | -9.0     | 0.1                    |
| N3O       | S=1        | <sup>3</sup> R+S | 0.0      | 0.0     | 0.0                    | 0.0      | 0.0                    |
|           |            | <sup>3</sup> TS  | 23.7     | 20.1    | 31.0                   | 18.6     | 29.5                   |
|           |            | <sup>3</sup> IH  | -1.0     | -7.8    | 0.6                    | -20.8    | -15.2                  |
|           | S=2        | <sup>5</sup> R+S | 5.0      | 2.8     | 1.7                    | 1.2      | 0.2                    |
|           |            | <sup>5</sup> TS  | 16.6     | 10.5    | 20.1                   | 6.2      | 15.8                   |
|           |            | <sup>5</sup> IH  | -11.3    | -14.1   | -10.1                  | -10.4    | -2.0                   |
| N2O2      | S=1        | <sup>3</sup> R+S | 0.0      | 0.0     | 0.0                    | 0.4      | 0.6                    |
|           |            | <sup>3</sup> TS  | 21.1     | 17.8    | 29.5                   | 16.3     | 28.5                   |
|           |            | <sup>3</sup> IH  | -3.0     | -10.0   | -1.5                   | -12.2    | -3.4                   |
|           | S=2        | <sup>5</sup> R+S | 3.6      | 1.4     | 1.1                    | 0.0      | 0.0                    |
|           |            | <sup>5</sup> TS  | 14.4     | 8.6     | 18.4                   | 4.6      | 14.8                   |
|           |            | <sup>5</sup> IH  | -16.4    | -18.9   | -11.6                  | -25.5    | -17.8                  |
| NO3       | S=1        | <sup>3</sup> R+S | 0.0      | 0.0     | 0.0                    | 2.8      | 4.3                    |
|           |            | <sup>3</sup> TS  | 17.1     | 14.3    | 27.1                   | 12.4     | 25.3                   |
|           |            | <sup>3</sup> IH  | -6.6     | -12.7   | -3.1                   | -15.5    | -5.8                   |
|           | S=2        | <sup>5</sup> R+S | 6.4      | 3.6     | 3.6                    | 0.0      | 0.0                    |
|           |            | <sup>5</sup> TS  | 13.0     | 7.2     | 17.5                   | 2.8      | 13.2                   |
|           |            | <sup>5</sup> IH  | -21.3    | -23.6   | -12.3                  | -30.9    | -19.7                  |
| O4        | S=1        | <sup>3</sup> R+S | 0.0      | 0.0     | 0.5                    | 0.0      | 0.7                    |
|           |            | <sup>3</sup> TS  | 14.7     | 12.1    | 20.8                   | 10.0     | 22.3                   |
|           |            | <sup>3</sup> IH  | -8.2     | -14.3   | -7.8                   | -17.3    | -9.3                   |
|           | S=2        | <sup>5</sup> R+S | 5.3      | 2.5     | 0.0                    | 0.8      | 0.0                    |
|           |            | <sup>5</sup> TS  | 11.3     | 5.8     | 13.7                   | 1.4      | 12.2                   |
|           |            | <sup>5</sup> IH  | -24.3    | -24.1   | -23.0                  | -39.5    | -34.4                  |

**Table S2.** Calculated LUMO energies for quintet states.

| Reactions | Spin State | LUMO (eV) |
|-----------|------------|-----------|
| N4        | S=2        | -3.56     |
| N3O       | S=2        | -3.58     |
| N2O2      | S=2        | -3.96     |
| NO3       | S=2        | -4.24     |
| O4        | S=2        | -4.60     |

**Table S3.** Calculated distortion energies for quintet states.

| Reactions | Spin State | Distortion Energy (kcal mol <sup>-1</sup> ) |
|-----------|------------|---------------------------------------------|
| N4        | S=2        | 13.10                                       |
| N3O       | S=2        | 12.37                                       |
| N2O2      | S=2        | 11.65                                       |
| NO3       | S=2        | 8.72                                        |
| O4        | S=2        | 4.88                                        |

**Table S4.** Spin densities and spin charges for oxidants.

| Species | Spin State | Mulliken Spin Density |       |                 |        | Mulliken Charges |        |                 |        |
|---------|------------|-----------------------|-------|-----------------|--------|------------------|--------|-----------------|--------|
|         |            | Fe                    | O     | N <sub>ax</sub> | Rest   | Fe               | O      | N <sub>ax</sub> | Rest   |
| N4      | S=1        | 1.321                 | 0.814 | -0.024          | -0.111 | 0.405            | -0.454 | -0.196          | 0.245  |
|         | S=2        | 2.998                 | 0.660 | -0.020          | 0.362  | 0.552            | -0.444 | -0.216          | 0.108  |
| N3O     | S=1        | 1.330                 | 0.823 | -0.024          | -0.129 | 0.469            | -0.440 | -0.209          | 0.180  |
|         | S=2        | 3.012                 | 0.688 | -0.019          | 0.319  | 0.606            | -0.430 | -0.237          | 0.061  |
| N2O2    | S=1        | 1.227                 | 0.842 | -0.019          | -0.050 | 0.517            | -0.431 | -0.229          | 0.143  |
|         | S=2        | 3.040                 | 0.723 | -0.019          | 0.256  | 0.640            | -0.425 | -0.269          | 0.050  |
| NO3     | S=1        | 1.204                 | 0.860 | -0.017          | -0.047 | 0.621            | -0.410 | -0.231          | 0.020  |
|         | S=2        | 3.060                 | 0.687 | -0.014          | 0.267  | 0.730            | -0.402 | -0.267          | -0.061 |
| O4      | S=1        | 1.149                 | 0.886 | -0.014          | -0.021 | 0.704            | -0.390 | -0.226          | -0.088 |
|         | S=2        | 3.079                 | 0.656 | -0.008          | 0.273  | 0.811            | -0.519 | -0.264          | -0.028 |

| Species |                 | Mulliken Charges |        |       |       |        | Mulliken Spin Density |       |        |        |        |
|---------|-----------------|------------------|--------|-------|-------|--------|-----------------------|-------|--------|--------|--------|
|         |                 | Fe               | O      | H     | DHA   | Rest   | Fe                    | O     | H      | DHA    | Rest   |
| N4      | <sup>3</sup> TS | 0.457            | -0.637 | 0.321 | 0.004 | -0.145 | 1.066                 | 0.586 | -0.046 | 0.507  | -0.113 |
|         | <sup>3</sup> IH | 0.411            | -0.723 | 0.408 | 0.340 | -0.436 | 1.016                 | 0.113 | -0.005 | 1.000  | -0.124 |
|         | <sup>5</sup> TS | 0.648            | -0.666 | 0.328 | 0.049 | -0.359 | 3.758                 | 0.284 | 0.015  | -0.378 | 0.321  |
|         | <sup>5</sup> IH | 0.623            | -0.772 | 0.431 | 0.050 | -0.332 | 4.032                 | 0.381 | 0.005  | -0.046 | -0.372 |
| N3O     | <sup>3</sup> TS | 0.513            | -0.620 | 0.319 | 0.021 | -0.233 | 1.002                 | 0.617 | -0.046 | 0.515  | -0.088 |
|         | <sup>3</sup> IH | 0.464            | -0.715 | 0.417 | 0.314 | -0.480 | 0.977                 | 0.126 | -0.005 | 1.000  | -0.098 |
|         | <sup>5</sup> TS | 0.698            | -0.651 | 0.322 | 0.061 | -0.430 | 3.762                 | 0.301 | 0.010  | 0.466  | -0.539 |
|         | <sup>5</sup> IH | 0.475            | -0.832 | 0.388 | 0.932 | -0.963 | 3.706                 | 0.099 | 0.003  | 0.308  | -0.116 |
| N2O2    | <sup>3</sup> TS | 0.559            | -0.613 | 0.313 | 0.040 | -0.299 | 0.962                 | 0.623 | -0.040 | 0.051  | 0.404  |
|         | <sup>3</sup> IH | 0.516            | -0.715 | 0.417 | 0.034 | -0.252 | 0.939                 | 0.130 | -0.005 | 0.980  | -0.044 |
|         | <sup>5</sup> TS | 0.727            | -0.641 | 0.318 | 0.074 | -0.478 | 3.757                 | 0.328 | 0.006  | 0.464  | -0.555 |
|         | <sup>5</sup> IH | 0.490            | -0.838 | 0.387 | 0.943 | -0.982 | 3.692                 | 0.109 | 0.003  | 0.028  | 0.168  |
| NO3     | <sup>3</sup> TS | 0.654            | -0.586 | 0.314 | 0.034 | -0.416 | 0.930                 | 0.655 | -0.042 | 0.499  | -0.042 |
|         | <sup>3</sup> IH | 0.612            | -0.709 | 0.424 | 0.038 | -0.365 | 0.920                 | 0.130 | -0.005 | 1.000  | -0.045 |
|         | <sup>5</sup> TS | 0.801            | -0.609 | 0.306 | 0.068 | -0.566 | 3.737                 | 0.355 | 0.002  | -0.425 | 0.331  |
|         | <sup>5</sup> IH | 0.557            | -0.836 | 0.391 | 0.903 | -1.015 | 3.689                 | 0.102 | 0.003  | 0.041  | 0.165  |
| O4      | <sup>3</sup> TS | 0.723            | -0.573 | 0.312 | 0.048 | -0.510 | 0.889                 | 0.675 | -0.037 | 0.492  | -0.019 |
|         | <sup>3</sup> IH | 0.692            | -0.704 | 0.428 | 0.039 | -0.455 | 0.884                 | 0.141 | -0.005 | 0.998  | -0.018 |
|         | <sup>5</sup> TS | 0.849            | -0.558 | 0.283 | 0.037 | -0.611 | 3.653                 | 0.396 | 0.001  | -0.347 | 0.291  |
|         | <sup>5</sup> IH | 0.544            | -0.864 | 0.377 | 1.014 | -1.071 | 3.688                 | 0.152 | 0.005  | 0.000  | 0.155  |

**Table S5.** Spin densities and spin charges for TS and intermediates

**Table S6.** Stability constants for all the complexes.

| Complex | log $\beta$ |
|---------|-------------|
| N4      | 28.19       |
| N3O     | 28.19       |
| N2O2    | 28.17       |
| NO3     | 28.17       |
| O4      | 28.16       |

**Table S7.** Spin state gap using different functionals where optimisation is done using 6-31G\*/LANL2DZ(Fe) and Def2tzvpp for refinement.

| Complex | B3LYP | TPSSH | M06L |
|---------|-------|-------|------|
| N4      | 2.1   | 3.2   | 2.9  |
| N3O     | 2.8   | 3.3   | 3.1  |
| N2O2    | 1.4   | 1.6   | 1.2  |

|     |     |     |     |
|-----|-----|-----|-----|
| NO3 | 3.6 | 3.2 | 1.6 |
| O4  | 2.5 | 1.6 | 1.2 |

**Cartesian coordinates of optimized geometries of stationary points of quintet state**

**Oxidants**

**N<sub>4</sub>**

|    |              |              |              |
|----|--------------|--------------|--------------|
| Fe | 0.657740000  | -2.094012000 | 0.061875000  |
| O  | 1.067535000  | -3.639410000 | 0.305422000  |
| N  | 2.147133000  | -1.578686000 | 1.464894000  |
| N  | -0.646939000 | -2.141232000 | 1.776348000  |
| N  | -0.892857000 | -2.696171000 | -1.310346000 |
| N  | 1.896487000  | -2.133263000 | -1.646887000 |
| C  | 1.681465000  | -2.291213000 | 2.695484000  |
| H  | 2.306714000  | -1.995316000 | 3.547638000  |
| H  | 1.813337000  | -3.359108000 | 2.523592000  |
| C  | 0.234554000  | -1.966764000 | 2.986258000  |
| H  | 0.138772000  | -0.932993000 | 3.319323000  |
| H  | -0.133798000 | -2.601815000 | 3.799405000  |
| C  | -1.278279000 | -3.503575000 | 1.807680000  |
| H  | -1.898351000 | -3.550980000 | 2.712819000  |
| H  | -0.472888000 | -4.231759000 | 1.909249000  |
| C  | -2.157380000 | -3.851022000 | 0.603670000  |
| H  | -2.568804000 | -4.846360000 | 0.814682000  |
| H  | -3.024810000 | -3.185852000 | 0.554316000  |
| C  | -1.486775000 | -3.964749000 | -0.767718000 |
| H  | -0.687678000 | -4.706262000 | -0.735121000 |
| H  | -2.238909000 | -4.304547000 | -1.492105000 |
| C  | -0.212724000 | -2.984162000 | -2.624399000 |
| H  | -0.680395000 | -3.856244000 | -3.094149000 |
| H  | -0.389233000 | -2.133154000 | -3.282460000 |
| C  | 1.270398000  | -3.221477000 | -2.462597000 |
| H  | 1.749976000  | -3.259970000 | -3.448993000 |
| H  | 1.458769000  | -4.163633000 | -1.948761000 |
| C  | 3.307787000  | -2.547206000 | -1.363549000 |
| H  | 3.862996000  | -2.462940000 | -2.306396000 |
| H  | 3.286429000  | -3.602004000 | -1.081118000 |
| C  | 4.009318000  | -1.757881000 | -0.266815000 |
| H  | 3.986831000  | -0.679893000 | -0.452643000 |
| H  | 5.066403000  | -2.049189000 | -0.299933000 |
| C  | 3.502921000  | -2.114766000 | 1.124221000  |
| H  | 3.453909000  | -3.201797000 | 1.217034000  |
| H  | 4.198041000  | -1.742767000 | 1.887667000  |
| C  | 2.269556000  | -0.117695000 | 1.731618000  |
| H  | 2.985861000  | 0.036620000  | 2.548506000  |
| H  | 1.308264000  | 0.301993000  | 2.018246000  |
| H  | 2.625448000  | 0.393013000  | 0.839418000  |
| C  | -1.712484000 | -1.105262000 | 1.898621000  |
| H  | -2.237352000 | -1.250864000 | 2.851938000  |
| H  | -2.438877000 | -1.168275000 | 1.096182000  |
| H  | -1.265303000 | -0.114412000 | 1.889513000  |
| C  | -1.987958000 | -1.734065000 | -1.623362000 |
| H  | -2.651354000 | -2.186567000 | -2.371968000 |
| H  | -1.564812000 | -0.819422000 | -2.034116000 |
| H  | -2.579379000 | -1.486529000 | -0.749020000 |
| C  | 1.923048000  | -0.861792000 | -2.424825000 |

|   |              |              |              |
|---|--------------|--------------|--------------|
| H | 2.481379000  | -1.027581000 | -3.355038000 |
| H | 2.411650000  | -0.076868000 | -1.848508000 |
| H | 0.912711000  | -0.541633000 | -2.670117000 |
| N | 0.143926000  | -0.089341000 | -0.248612000 |
| C | -0.140610000 | 1.019381000  | -0.415042000 |
| C | -0.496917000 | 2.407095000  | -0.635240000 |
| H | -1.421615000 | 2.441030000  | -1.221577000 |
| H | 0.325679000  | 2.914648000  | -1.152689000 |
| H | -0.675626000 | 2.890582000  | 0.329803000  |
| O | -3.643560000 | 1.655974000  | -1.452141000 |
| O | -4.696944000 | -0.118330000 | -0.037675000 |
| C | -5.761742000 | 2.280041000  | -0.028829000 |
| F | -6.407094000 | 2.051513000  | 1.129370000  |
| F | -6.598846000 | 1.973523000  | -1.036244000 |
| F | -5.493476000 | 3.596412000  | -0.099602000 |
| S | 3.609586000  | 3.242174000  | -0.877733000 |
| O | 3.713019000  | 1.761304000  | -0.948458000 |
| O | 2.445060000  | 3.818732000  | -1.593006000 |
| O | 4.885004000  | 3.967954000  | -1.052764000 |
| C | 3.191909000  | 3.542492000  | 0.907464000  |
| F | 3.112252000  | 4.857195000  | 1.171302000  |
| F | 4.122557000  | 3.009878000  | 1.719161000  |
| F | 2.004003000  | 2.986698000  | 1.228992000  |
| S | -4.201665000 | 1.276320000  | -0.129797000 |
| O | -3.419773000 | 1.746133000  | 1.038208000  |

**N<sub>3</sub>O**

|    |              |              |              |
|----|--------------|--------------|--------------|
| Fe | 0.590956000  | 1.897017000  | 0.163899000  |
| O  | 1.194358000  | 3.272264000  | 0.768486000  |
| N  | 0.715535000  | 2.787756000  | -1.791812000 |
| N  | -1.428697000 | 2.818814000  | 0.195806000  |
| N  | 0.500344000  | 1.022650000  | 2.155279000  |
| C  | -0.069063000 | 4.043296000  | -1.577299000 |
| H  | -0.201742000 | 4.558997000  | -2.537075000 |
| H  | 0.513336000  | 4.686280000  | -0.918325000 |
| C  | -1.448429000 | 3.755227000  | -0.981866000 |
| H  | -2.090393000 | 3.310170000  | -1.742916000 |
| H  | -1.908589000 | 4.704793000  | -0.687066000 |
| C  | -1.501858000 | 3.577495000  | 1.488416000  |
| H  | -2.496598000 | 4.041988000  | 1.539133000  |
| H  | -0.761382000 | 4.377181000  | 1.434782000  |
| C  | -1.293767000 | 2.756828000  | 2.772539000  |
| H  | -1.473981000 | 3.462529000  | 3.593444000  |
| H  | -2.075282000 | 1.997464000  | 2.870438000  |
| C  | 0.085812000  | 2.142598000  | 3.065953000  |
| H  | 0.861236000  | 2.908987000  | 3.020522000  |
| H  | 0.068483000  | 1.737738000  | 4.086859000  |
| C  | 1.892236000  | 0.536240000  | 2.462512000  |
| H  | 2.089414000  | 0.651205000  | 3.534993000  |
| H  | 1.922457000  | -0.526402000 | 2.216072000  |
| C  | 2.983194000  | 1.227763000  | 1.669832000  |
| H  | 3.931361000  | 0.708780000  | 1.845103000  |
| H  | 3.099210000  | 2.285473000  | 1.928592000  |
| C  | 3.656381000  | 1.690122000  | -0.588914000 |
| H  | 4.487061000  | 0.977572000  | -0.616661000 |

|    |              |                                   |              |    |              |                       |              |
|----|--------------|-----------------------------------|--------------|----|--------------|-----------------------|--------------|
| H  | 4.010342000  | 2.627128000                       | -0.140972000 | H  | -1.024573000 | -0.241902000          | 3.683474000  |
| C  | 3.123694000  | 1.940663000                       | -1.991349000 | H  | -1.241001000 | 0.652700000           | 2.150421000  |
| H  | 2.713587000  | 1.014266000                       | -2.406838000 | C  | -2.159551000 | -1.296834000          | 2.184124000  |
| H  | 3.998229000  | 2.188522000                       | -2.605075000 | H  | -3.138632000 | -0.860480000          | 2.401018000  |
| C  | 2.141579000  | 3.113627000                       | -2.123275000 | H  | -2.060171000 | -2.265516000          | 2.685779000  |
| H  | 2.454551000  | 3.926958000                       | -1.464074000 | C  | -2.881371000 | -2.586166000          | 0.252737000  |
| H  | 2.153757000  | 3.493620000                       | -3.152717000 | H  | -3.919708000 | -2.283679000          | 0.414329000  |
| C  | 0.113676000  | 1.993259000                       | -2.895898000 | H  | -2.670086000 | -3.482831000          | 0.847093000  |
| H  | 0.089560000  | 2.607343000                       | -3.805022000 | C  | -2.636388000 | -2.828731000          | -1.232955000 |
| H  | -0.900120000 | 1.689444000                       | -2.638304000 | H  | -2.803096000 | -1.898504000          | -1.784746000 |
| H  | 0.709859000  | 1.101349000                       | -3.082425000 | H  | -3.430076000 | -3.515779000          | -1.550962000 |
| C  | -2.578252000 | 1.888314000                       | 0.065248000  | C  | -1.312004000 | -3.503341000          | -1.632464000 |
| H  | -3.515445000 | 2.461237000                       | 0.051448000  | H  | -1.102930000 | -4.339646000          | -0.962506000 |
| H  | -2.612917000 | 1.182143000                       | 0.890836000  | H  | -1.400843000 | -3.897277000          | -2.651783000 |
| H  | -2.487904000 | 1.331390000                       | -0.865971000 | C  | -0.176230000 | -1.645121000          | -2.761489000 |
| C  | -0.418752000 | -0.137100000                      | 2.337351000  | H  | -0.208223000 | -2.226923000          | -3.689952000 |
| H  | -0.431373000 | -0.414630000                      | 3.400001000  | H  | 0.699915000  | -0.999204000          | -2.772840000 |
| H  | -0.055812000 | -0.983918000                      | 1.758443000  | H  | -1.069042000 | -1.026447000          | -2.690819000 |
| H  | -1.430673000 | 0.098392000                       | 2.022354000  | N  | -0.004727000 | 0.173705000           | -0.470642000 |
| N  | 0.001653000  | 0.097754000                       | -0.634312000 | C  | 0.015857000  | 1.274184000           | -0.825144000 |
| C  | -0.238785000 | -0.957425000                      | -1.044019000 | C  | 0.033071000  | 2.647691000           | -1.281973000 |
| C  | -0.554209000 | -2.273765000                      | -1.557507000 | H  | 0.956621000  | 3.131195000           | -0.938618000 |
| H  | -1.419407000 | -2.676369000                      | -1.014168000 | H  | -0.852312000 | 3.163597000           | -0.888961000 |
| H  | 0.310924000  | -2.934539000                      | -1.419973000 | H  | 0.002743000  | 2.658833000           | -2.377217000 |
| H  | -0.797421000 | -2.194494000                      | -2.622610000 | O  | 3.199871000  | 3.595185000           | -0.467205000 |
| O  | 2.639957000  | 1.119746000                       | 0.271163000  | O  | 5.314387000  | 2.893539000           | 0.674638000  |
| O  | -3.372424000 | -3.293224000                      | -0.001006000 | C  | 4.117224000  | 1.179738000           | -0.909408000 |
| O  | -5.569613000 | -2.582939000                      | 0.963689000  | F  | 4.628143000  | 0.076664000           | -0.329530000 |
| C  | -4.548785000 | -1.179039000                      | -1.002734000 | F  | 4.942240000  | 1.537874000           | -1.909042000 |
| F  | -5.169910000 | -0.024700000                      | -0.696490000 | F  | 2.933353000  | 0.841421000           | -1.461680000 |
| F  | -5.324449000 | -1.849599000                      | -1.870683000 | S  | 3.917874000  | 2.561113000           | 0.319714000  |
| F  | -3.400161000 | -0.865559000                      | -1.643140000 | O  | 3.118213000  | 1.938543000           | 1.401661000  |
| S  | -4.214954000 | -2.188251000                      | 0.521803000  | O  | -5.253035000 | 3.016326000           | 0.785481000  |
| O  | -3.512175000 | -1.232097000                      | 1.410379000  | O  | -3.072894000 | 3.570920000           | -0.311856000 |
| O  | 3.649591000  | -4.297532000                      | 1.176560000  | C  | -4.141358000 | 1.220323000           | -0.767917000 |
| O  | 2.006324000  | -4.294899000                      | -0.714546000 | F  | -2.973800000 | 0.795932000           | -1.292429000 |
| C  | 3.692229000  | -2.300976000                      | -0.527306000 | F  | -4.917583000 | 1.631002000           | -1.786356000 |
| F  | 2.933087000  | -1.538777000                      | -1.338483000 | F  | -4.743039000 | 0.160970000           | -0.193280000 |
| F  | 4.617338000  | -2.911676000                      | -1.288069000 | S  | -3.875085000 | 2.589971000           | 0.460774000  |
| F  | 4.339069000  | -1.483234000                      | 0.326572000  | O  | -3.145995000 | 1.918447000           | 1.564022000  |
| S  | 2.655208000  | -3.541431000                      | 0.387179000  | O  | -2.047824000 | -1.498616000          | 0.749893000  |
| O  | 1.731322000  | -2.688542000                      | 1.176514000  | O  | 0.230470000  | -0.772581000          | 2.099435000  |
|    |              | <b>N<sub>2</sub>O<sub>2</sub></b> |              | O  | 2.077081000  | -1.838315000          | 0.061603000  |
| Fe | -0.011786000 | -1.740710000                      | 0.300450000  |    |              | <b>NO<sub>3</sub></b> |              |
| O  | -0.027154000 | -3.216961000                      | 0.966396000  | Fe | -0.024838000 | -1.773042000          | 0.335068000  |
| N  | -0.109606000 | -2.595820000                      | -1.613966000 | O  | -0.077914000 | -3.219082000          | 1.056545000  |
| C  | 1.180222000  | -3.362328000                      | -1.657651000 | N  | -0.170298000 | -2.616644000          | -1.509719000 |
| H  | 1.365733000  | -3.708385000                      | -2.681406000 | C  | 1.120973000  | -3.377087000          | -1.615450000 |
| H  | 1.072456000  | -4.231266000                      | -1.007725000 | H  | 1.270393000  | -3.707828000          | -3.649555000 |
| C  | 2.363192000  | -2.501894000                      | -1.201967000 | H  | 1.044361000  | -4.253956000          | -0.971369000 |
| H  | 2.596450000  | -1.705716000                      | -1.909935000 | C  | 2.275234000  | -2.497765000          | -1.173921000 |
| H  | 3.243496000  | -3.138468000                      | -1.084835000 | H  | 2.492455000  | -1.683873000          | -1.865747000 |
| C  | 2.798329000  | -2.329992000                      | 1.230591000  | H  | 3.176486000  | -3.097407000          | -1.035248000 |
| H  | 3.860494000  | -2.319573000                      | 0.972144000  | C  | 2.701629000  | -2.308479000          | 1.256027000  |
| H  | 2.484082000  | -3.359982000                      | 1.433278000  | H  | 3.746856000  | -2.290946000          | 0.940685000  |
| C  | 2.553146000  | -1.408011000                      | 2.420411000  | H  | 2.403620000  | -3.335405000          | 1.490619000  |
| H  | 3.236012000  | -1.743846000                      | 3.211576000  | C  | 2.504307000  | -1.360956000          | 2.427639000  |
| H  | 2.839690000  | -0.384069000                      | 2.154536000  | H  | 3.181654000  | -1.705990000          | 3.219401000  |
| C  | 1.156620000  | -1.402785000                      | 3.034211000  | H  | 2.816875000  | -0.350851000          | 2.140832000  |
| H  | 0.797714000  | -2.410400000                      | 3.270782000  | C  | 1.107430000  | -1.312238000          | 3.025871000  |
| H  | 1.152327000  | -0.792271000                      | 3.941239000  | H  | 0.740763000  | -2.299004000          | 3.328104000  |
| C  | -1.066378000 | -0.327547000                      | 2.595179000  | H  | 1.088558000  | -0.634118000          | 3.882843000  |

|   |              |              |              |   |              |              |              |
|---|--------------|--------------|--------------|---|--------------|--------------|--------------|
| C | -1.073527000 | -0.221348000 | 2.465730000  | C | -1.157951000 | -0.537086000 | 2.387463000  |
| H | -1.065377000 | -0.096405000 | 3.550782000  | H | -1.171831000 | -0.514770000 | 3.478684000  |
| H | -1.189287000 | 0.747861000  | 1.980917000  | H | -1.318183000 | 0.463361000  | 1.984741000  |
| C | -2.171126000 | -1.169527000 | 2.050653000  | C | -2.184644000 | -1.508307000 | 1.854850000  |
| H | -3.147654000 | -0.687615000 | 2.139480000  | H | -3.190284000 | -1.089046000 | 1.938386000  |
| H | -2.151353000 | -2.101430000 | 2.624360000  | H | -2.136889000 | -2.486805000 | 2.342479000  |
| C | -2.888398000 | -2.537471000 | 0.207098000  | C | -2.788300000 | -2.592542000 | -0.245656000 |
| H | -3.889612000 | -2.126394000 | 0.357482000  | H | -3.783269000 | -2.153007000 | -0.145936000 |
| H | -2.746574000 | -3.404666000 | 0.861089000  | H | -2.757327000 | -3.558141000 | 0.270879000  |
| C | -2.678933000 | -2.900656000 | -1.249158000 | C | -2.406294000 | -2.716903000 | -1.709783000 |
| H | -2.869657000 | -2.031284000 | -1.884955000 | H | -2.393547000 | -1.730263000 | -2.184308000 |
| H | -3.456574000 | -3.635817000 | -1.489117000 | H | -3.205669000 | -3.293633000 | -2.190895000 |
| C | -1.336334000 | -3.560536000 | -1.565365000 | C | -1.112265000 | -3.460909000 | -1.985521000 |
| H | -1.139202000 | -4.366560000 | -0.856032000 | H | -1.065491000 | -4.417920000 | -1.454366000 |
| H | -1.360066000 | -3.986765000 | -2.574845000 | H | -0.984868000 | -3.630990000 | -3.058165000 |
| C | -0.269235000 | -1.653584000 | -2.650559000 | N | 0.032503000  | -0.008525000 | -0.666682000 |
| H | -0.363819000 | -2.231338000 | -3.576443000 | C | 0.017143000  | 1.066458000  | -1.091554000 |
| H | 0.623144000  | -1.034712000 | -2.704001000 | C | -0.007316000 | 2.419816000  | -1.611931000 |
| H | -1.138008000 | -1.010491000 | -2.531538000 | H | 0.872345000  | 2.963100000  | -1.245436000 |
| N | 0.029311000  | 0.174697000  | -0.483737000 | H | -0.928702000 | 2.911894000  | -1.274684000 |
| C | 0.085166000  | 1.269147000  | -0.851764000 | H | 0.012763000  | 2.388335000  | -2.706489000 |
| C | 0.144974000  | 2.635084000  | -1.334010000 | O | 3.062013000  | 3.655133000  | -0.443578000 |
| H | 1.058656000  | 3.114667000  | -0.962154000 | O | 5.103941000  | 2.965652000  | 0.831932000  |
| H | -0.748408000 | 3.171610000  | -0.991453000 | C | 4.082178000  | 1.286746000  | -0.904083000 |
| H | 0.162707000  | 2.625673000  | -2.429518000 | F | 4.534298000  | 0.156942000  | -0.324373000 |
| O | 3.340840000  | 3.562342000  | -0.502478000 | F | 5.003247000  | 1.687070000  | -1.796833000 |
| O | 5.408726000  | 2.789160000  | 0.678782000  | F | 2.961908000  | 0.972656000  | -1.589653000 |
| C | 4.177299000  | 1.113068000  | -0.918894000 | S | 3.748649000  | 2.611912000  | 0.357761000  |
| F | 4.625156000  | -0.008951000 | -0.321683000 | O | 2.888777000  | 1.923034000  | 1.350085000  |
| F | 5.040661000  | 1.429209000  | -1.899392000 | O | -5.120499000 | 3.123299000  | 0.861333000  |
| F | 2.993433000  | 0.821850000  | -1.497907000 | O | -3.010463000 | 3.466114000  | -0.438988000 |
| S | 4.007287000  | 2.507063000  | 0.300533000  | C | -4.234836000 | 1.156346000  | -0.632386000 |
| O | 3.166800000  | 1.917349000  | 1.370138000  | F | -3.130239000 | 0.606602000  | -1.174620000 |
| O | -5.164271000 | 3.219428000  | 0.721076000  | F | -5.039701000 | 1.536207000  | -1.638813000 |
| O | -3.001217000 | 3.530985000  | -0.498308000 | F | -4.872947000 | 0.191530000  | 0.063075000  |
| C | -4.216436000 | 1.212591000  | -0.676608000 | S | -3.799695000 | 2.591906000  | 0.463539000  |
| F | -3.095404000 | 0.661683000  | -1.181597000 | O | -3.022217000 | 1.951115000  | 1.552414000  |
| F | -5.002359000 | 1.560143000  | -1.710253000 | O | -1.879523000 | -1.677992000 | 0.438578000  |
| F | -4.860726000 | 0.259439000  | 0.028005000  | O | 0.169773000  | -0.957294000 | 1.930989000  |
| S | -3.826753000 | 2.680764000  | 0.394415000  | O | 1.982236000  | -1.880392000 | 0.031141000  |
| O | -3.094188000 | 2.075466000  | 1.533756000  | O | 0.030194000  | -2.650838000 | -1.569540000 |
| O | -1.959559000 | -1.495830000 | 0.640145000  |   |              |              |              |
| O | 0.206882000  | -0.755992000 | 2.027351000  |   |              |              |              |
| O | 1.923680000  | -1.860235000 | 0.096788000  |   |              |              |              |

**O<sub>4</sub>**

|    |             |              |              |
|----|-------------|--------------|--------------|
| Fe | 0.048883000 | -1.920109000 | 0.249908000  |
| O  | 0.025821000 | -3.385707000 | 0.933522000  |
| C  | 1.315073000 | -3.300946000 | -1.804452000 |
| H  | 1.422414000 | -3.472832000 | -2.879223000 |
| H  | 1.328933000 | -4.253570000 | -1.266136000 |
| C  | 2.364611000 | -2.337218000 | -1.304172000 |
| H  | 2.418058000 | -1.439663000 | -1.920343000 |
| H  | 3.343398000 | -2.817138000 | -1.256480000 |
| C  | 2.786876000 | -2.337546000 | 1.166087000  |
| H  | 3.830169000 | -2.245244000 | 0.857992000  |
| H  | 2.547484000 | -3.387925000 | 1.360260000  |
| C  | 2.513197000 | -1.435316000 | 2.358680000  |
| H  | 3.187807000 | -1.760368000 | 3.160905000  |
| H  | 2.773884000 | -0.402618000 | 2.101983000  |
| C  | 1.104242000 | -1.479619000 | 2.929288000  |
| H  | 0.786864000 | -2.489614000 | 3.208027000  |
| H  | 1.030360000 | -0.815592000 | 3.793343000  |

**TS**

**N<sub>4</sub>**

|    |              |              |              |
|----|--------------|--------------|--------------|
| Fe | -0.601789000 | -0.235085000 | -0.099054000 |
| O  | -2.244110000 | -0.686990000 | -0.269082000 |
| N  | -1.056033000 | 1.585552000  | -1.276836000 |
| N  | -0.064948000 | -1.058469000 | -2.142418000 |
| N  | -0.096544000 | -2.154651000 | 0.996042000  |
| N  | -1.076626000 | 0.469913000  | 1.946448000  |
| C  | -1.556201000 | 0.974659000  | -2.541744000 |
| H  | -1.730760000 | 1.759650000  | -3.291716000 |
| H  | -2.508787000 | 0.496943000  | -2.318543000 |
| C  | -0.572680000 | -0.039747000 | -3.125937000 |
| H  | 0.295301000  | 0.484932000  | -3.528213000 |
| H  | -1.054068000 | -0.549668000 | -3.969448000 |
| C  | -0.842074000 | -2.335389000 | -2.245639000 |
| H  | -0.658113000 | -2.757007000 | -3.245199000 |
| H  | -1.898877000 | -2.076145000 | -2.180229000 |
| C  | -0.503973000 | -3.422836000 | -1.210388000 |
| H  | -1.080883000 | -4.302860000 | -1.523709000 |



|   |              |              |              |    |              |                       |              |
|---|--------------|--------------|--------------|----|--------------|-----------------------|--------------|
| H | 0.544289000  | -3.722459000 | -1.304100000 | C  | -5.438401000 | -3.538411000          | 2.546990000  |
| C | -0.868766000 | -3.213150000 | 0.270315000  | C  | -6.264074000 | 0.342914000           | 0.822171000  |
| H | -1.925610000 | -2.962922000 | 0.362764000  | C  | -4.669463000 | -1.598246000          | -0.619424000 |
| H | -0.699628000 | -4.166015000 | 0.794036000  | C  | -5.421568000 | -0.574366000          | -1.380691000 |
| C | -0.626344000 | -1.959722000 | 2.390422000  | C  | -6.210648000 | 0.371598000           | -0.689291000 |
| H | -1.123973000 | -2.877177000 | 2.727821000  | C  | -6.918137000 | 1.333477000           | -1.417717000 |
| H | 0.232865000  | -1.806294000 | 3.044935000  | H  | -7.536950000 | 2.053594000           | -0.887299000 |
| C | -1.600418000 | -0.791736000 | 2.547110000  | C  | -6.842762000 | 1.375392000           | -2.811644000 |
| H | -1.791834000 | -0.642103000 | 3.619467000  | C  | -6.057799000 | 0.440944000           | -3.499173000 |
| H | -2.546155000 | -1.017848000 | 2.057962000  | C  | -5.354183000 | -0.525550000          | -2.786449000 |
| C | -2.163022000 | 1.495185000  | 1.866754000  | H  | -7.226838000 | 0.729952000           | 1.174904000  |
| H | -2.314064000 | 1.901641000  | 2.876891000  | H  | -6.627277000 | -2.864746000          | 4.221541000  |
| H | -3.079549000 | 0.977056000  | 1.577349000  | H  | -7.121539000 | -0.652479000          | 3.217574000  |
| C | -1.913734000 | 2.653336000  | 0.889353000  | H  | -4.336638000 | -3.927620000          | 0.737323000  |
| H | -0.931894000 | 3.110001000  | 1.050101000  | H  | -5.228417000 | -4.512932000          | 2.979214000  |
| H | -2.645206000 | 3.428017000  | 1.152634000  | H  | -3.530011000 | -1.119821000          | -0.422580000 |
| C | -2.151082000 | 2.342278000  | -0.596101000 | H  | -7.400657000 | 2.128891000           | -3.361081000 |
| H | -3.065719000 | 1.755225000  | -0.697427000 | H  | -6.004443000 | 0.463923000           | -4.584167000 |
| H | -2.296582000 | 3.284716000  | -1.143177000 | H  | -4.753644000 | -1.263721000          | -3.312863000 |
| C | 0.085094000  | 2.492817000  | -1.540796000 | H  | -5.507329000 | 1.046168000           | 1.210555000  |
| H | -0.230602000 | 3.297482000  | -2.220099000 | H  | -4.394772000 | -2.470199000          | -1.221815000 |
| H | 0.909895000  | 1.945763000  | -1.995699000 |    |              | <b>N<sub>3</sub>O</b> |              |
| H | 0.433976000  | 2.929792000  | -0.606350000 | Fe | 0.350988000  | -0.373542000          | 0.298181000  |
| C | 1.364355000  | -1.310126000 | -2.453818000 | O  | 2.031258000  | -0.636767000          | 0.467603000  |
| H | 1.457961000  | -1.722850000 | -3.468898000 | N  | 0.065963000  | -0.934775000          | 2.413789000  |
| H | 1.810188000  | -2.007567000 | -1.749706000 | N  | -0.003148000 | -2.511992000          | -0.065100000 |
| H | 1.917942000  | -0.372795000 | -2.401927000 | N  | 0.500339000  | 0.225802000           | -1.845957000 |
| C | 1.326077000  | -2.563690000 | 1.110981000  | C  | 0.705353000  | -2.284624000          | 2.387028000  |
| H | 1.397524000  | -3.514958000 | 1.656348000  | H  | 0.555462000  | -2.789110000          | 3.351739000  |
| H | 1.881392000  | -1.801349000 | 1.656716000  | H  | 1.772932000  | -2.138293000          | 2.235776000  |
| H | 1.785422000  | -2.688230000 | 0.134527000  | C  | 0.123012000  | -3.176100000          | 1.282464000  |
| C | 0.054517000  | 0.998197000  | 2.745829000  | H  | -0.873816000 | -3.511912000          | 1.572150000  |
| H | -0.283817000 | 1.206201000  | 3.771015000  | H  | 0.748141000  | -4.071124000          | 1.191209000  |
| H | 0.435462000  | 1.918490000  | 2.301810000  | C  | 1.093376000  | -2.940967000          | -0.994733000 |
| H | 0.865375000  | 0.270818000  | 2.782011000  | H  | 0.949908000  | -4.010911000          | -1.203790000 |
| N | 1.509571000  | 0.382105000  | 0.141404000  | H  | 2.032355000  | -2.825755000          | -0.454005000 |
| C | 2.624603000  | 0.680351000  | 0.229180000  | C  | 1.173064000  | -2.207093000          | -2.347932000 |
| C | 4.022344000  | 1.049735000  | 0.345128000  | H  | 1.980822000  | -2.712942000          | -2.892488000 |
| H | 4.585469000  | 0.204715000  | 0.760393000  | H  | 0.270026000  | -2.400922000          | -2.934752000 |
| H | 4.110358000  | 1.934889000  | 0.986200000  | C  | 1.531271000  | -0.707949000          | -2.403999000 |
| H | 4.415686000  | 1.285819000  | -0.649055000 | H  | 2.462013000  | -0.523768000          | -1.867376000 |
| O | 5.649267000  | -1.768559000 | 1.128331000  | H  | 1.686737000  | -0.440669000          | -3.459648000 |
| O | 4.486414000  | -3.973208000 | 0.907550000  | C  | 0.973033000  | 1.652531000           | -1.823901000 |
| C | 6.613634000  | -3.526906000 | -0.566196000 | H  | 1.658018000  | 1.831041000           | -2.662901000 |
| F | 6.288950000  | -4.501666000 | -1.435169000 | H  | 0.092842000  | 2.283122000           | -1.962279000 |
| F | 7.436857000  | -4.054802000 | 0.357879000  | C  | 1.646707000  | 2.076553000           | -0.530702000 |
| F | 7.298504000  | -2.585123000 | -1.240146000 | H  | 1.790595000  | 3.162072000           | -0.545073000 |
| S | 5.094474000  | -2.808881000 | 0.225365000  | H  | 2.610817000  | 1.586416000           | -0.370287000 |
| O | 4.332541000  | -2.283419000 | -0.933252000 | C  | 1.277341000  | 2.164527000           | 1.847326000  |
| S | 2.613473000  | 4.859840000  | 1.352687000  | H  | 1.153948000  | 3.252085000           | 1.891173000  |
| O | 1.338671000  | 4.107964000  | 1.479141000  | H  | 2.347686000  | 1.930073000           | 1.892762000  |
| O | 3.817474000  | 4.126251000  | 1.813928000  | C  | 0.534524000  | 1.507519000           | 3.005641000  |
| O | 2.545595000  | 6.281511000  | 1.751859000  | H  | -0.541344000 | 1.686371000           | 2.903992000  |
| C | 2.861509000  | 4.948414000  | -0.486567000 | H  | 0.847935000  | 2.055090000           | 3.903159000  |
| F | 3.963364000  | 5.653165000  | -0.793727000 | C  | 0.843058000  | 0.021093000           | 3.263003000  |
| F | 1.811282000  | 5.534309000  | -1.089694000 | H  | 1.904272000  | -0.164138000          | 3.084153000  |
| F | 3.001514000  | 3.715551000  | -1.019037000 | H  | 0.634601000  | -0.216624000          | 4.315013000  |
| C | -6.224866000 | -2.612375000 | 3.244161000  | C  | -1.322035000 | -1.040054000          | 2.924736000  |
| C | -6.502242000 | -1.365883000 | 2.678710000  | H  | -1.310445000 | -1.486808000          | 3.928532000  |
| C | -5.996859000 | -1.019870000 | 1.421411000  | H  | -1.929549000 | -1.657839000          | 2.264868000  |
| C | -5.207712000 | -1.953882000 | 0.713985000  | H  | -1.775436000 | -0.050989000          | 2.983239000  |
| C | -4.935814000 | -3.209166000 | 1.291499000  | C  | -1.333706000 | -2.855469000          | -0.629339000 |

|    |              |                                   |              |   |              |              |              |
|----|--------------|-----------------------------------|--------------|---|--------------|--------------|--------------|
| H  | -1.421448000 | -3.944507000                      | -0.743410000 | H | 0.468488000  | -2.306165000 | 3.701097000  |
| H  | -1.474232000 | -2.392309000                      | -1.602425000 | H | 1.693983000  | -1.797913000 | 2.517613000  |
| H  | -2.118740000 | -2.502998000                      | 0.037067000  | C | -0.020772000 | -2.798332000 | 1.665538000  |
| C  | -0.722381000 | 0.190712000                       | -2.690471000 | H | -1.080426000 | -2.966684000 | 1.859678000  |
| H  | -0.468652000 | 0.498296000                       | -3.714902000 | H | 0.490979000  | -3.764356000 | 1.673905000  |
| H  | -1.464915000 | 0.878742000                       | -2.289255000 | C | 1.072630000  | -2.820076000 | -0.537937000 |
| H  | -1.145877000 | -0.809993000                      | -2.725484000 | H | 0.903595000  | -3.901580000 | -0.541509000 |
| N  | -1.766901000 | 0.271343000                       | 0.267091000  | H | 2.051980000  | -2.608753000 | -0.100749000 |
| C  | -2.840435000 | 0.703684000                       | 0.277275000  | C | 0.970774000  | -2.297711000 | -1.968756000 |
| C  | -4.192668000 | 1.227530000                       | 0.302386000  | H | 1.756316000  | -2.828836000 | -2.521738000 |
| H  | -4.850065000 | 0.556089000                       | -0.263915000 | H | 0.022947000  | -2.625088000 | -2.406627000 |
| H  | -4.206913000 | 2.234993000                       | -0.131062000 | C | 1.200677000  | -0.800020000 | -2.239323000 |
| H  | -4.537950000 | 1.275183000                       | 1.340948000  | H | 2.154040000  | -0.478231000 | -1.818955000 |
| O  | 0.763601000  | 1.735956000                       | 0.562848000  | H | 1.237172000  | -0.652651000 | -3.327819000 |
| O  | -6.092784000 | -1.172956000                      | -1.087074000 | C | 0.430353000  | 1.555008000  | -1.928494000 |
| O  | -6.884290000 | -3.544072000                      | -1.033726000 | H | 0.984690000  | 1.678736000  | -2.867492000 |
| C  | -5.309872000 | -2.707105000                      | 0.887384000  | H | -0.527813000 | 2.068596000  | -2.024017000 |
| F  | -4.906790000 | -3.944224000                      | 1.225150000  | C | 1.207310000  | 2.222867000  | -0.803325000 |
| F  | -6.358014000 | -2.385021000                      | 1.663745000  | H | 1.233077000  | 3.303282000  | -0.976661000 |
| F  | -4.302259000 | -1.854578000                      | 1.192485000  | H | 2.228764000  | 1.844760000  | -0.707037000 |
| S  | -5.746342000 | -2.606353000                      | -0.915593000 | C | 1.171621000  | 2.524244000  | 1.603519000  |
| O  | -4.496511000 | -3.035790000                      | -1.584600000 | H | 1.035051000  | 3.609451000  | 1.554265000  |
| O  | -2.262749000 | 5.907630000                       | -1.900245000 | H | 2.240539000  | 2.295647000  | 1.530285000  |
| O  | -3.969705000 | 4.432181000                       | -0.812584000 | C | 0.583916000  | 1.989349000  | 2.907785000  |
| C  | -1.607753000 | 4.643013000                       | 0.303180000  | H | -0.495563000 | 2.174525000  | 2.920794000  |
| F  | -1.834471000 | 3.540475000                       | 1.043639000  | H | 1.007580000  | 2.624720000  | 3.695399000  |
| F  | -1.949399000 | 5.710500000                       | 1.045946000  | C | 0.913566000  | 0.533084000  | 3.299079000  |
| F  | -0.282810000 | 4.715909000                       | 0.065954000  | H | 1.949792000  | 0.307882000  | 3.041294000  |
| S  | -2.572972000 | 4.599966000                       | -1.284807000 | H | 0.802448000  | 0.421882000  | 4.385786000  |
| O  | -2.013947000 | 3.418596000                       | -1.987605000 | C | -1.295044000 | -0.490065000 | 3.283564000  |
| C  | 6.006817000  | 2.421969000                       | 1.755529000  | H | -1.185132000 | -0.764561000 | 4.341199000  |
| C  | 5.361233000  | 1.196012000                       | 1.888587000  | H | -1.961690000 | -1.201016000 | 2.797949000  |
| C  | 5.284188000  | 0.302743000                       | 0.802659000  | H | -1.742248000 | 0.500800000  | 3.217990000  |
| C  | 5.865782000  | 0.658926000                       | -0.434416000 | C | -1.168222000 | -0.229474000 | -2.342506000 |
| C  | 6.516897000  | 1.890898000                       | -0.553119000 | H | -1.038006000 | -0.246624000 | -3.433530000 |
| C  | 6.586145000  | 2.771343000                       | 0.528979000  | H | -1.903476000 | 0.531434000  | -2.088366000 |
| C  | 4.594431000  | -1.002250000                      | 0.937286000  | H | -1.539243000 | -1.198240000 | -2.009615000 |
| C  | 5.759261000  | -0.286169000                      | -1.610587000 | N | -1.913658000 | 0.215674000  | 0.493995000  |
| C  | 5.626789000  | -1.741001000                      | -1.218373000 | C | -3.048858000 | 0.437704000  | 0.505325000  |
| C  | 5.046793000  | -2.079011000                      | 0.024167000  | C | -4.476193000 | 0.690502000  | 0.523960000  |
| C  | 4.895285000  | -3.434260000                      | 0.373832000  | H | -4.983235000 | -0.091756000 | -0.054877000 |
| H  | 4.454989000  | -3.686589000                      | 1.335664000  | H | -4.678329000 | 1.680035000  | 0.096069000  |
| C  | 5.316549000  | -4.441804000                      | -0.489128000 | H | -4.832622000 | 0.661455000  | 1.559465000  |
| C  | 5.896595000  | -4.104310000                      | -1.718724000 | O | 0.501528000  | 1.968710000  | 0.439742000  |
| C  | 6.051430000  | -2.762415000                      | -2.074025000 | O | -5.640697000 | -2.141372000 | -0.928323000 |
| H  | 4.496729000  | -1.332481000                      | 1.976795000  | O | -5.311419000 | -4.559318000 | -1.477463000 |
| H  | 6.067640000  | 3.100194000                       | 2.602178000  | C | -4.074808000 | -3.570202000 | 0.612417000  |
| H  | 4.921551000  | 0.910112000                       | 2.841164000  | F | -3.098939000 | -4.497685000 | 0.628101000  |
| H  | 6.977782000  | 2.160253000                       | -1.500644000 | F | -5.062504000 | -3.996050000 | 1.417810000  |
| H  | 7.097827000  | 3.723665000                       | 0.419089000  | F | -3.567575000 | -2.439511000 | 1.152673000  |
| H  | 4.870278000  | -0.004891000                      | -2.201096000 | S | -4.691102000 | -3.266759000 | -1.114669000 |
| H  | 5.202937000  | -5.484534000                      | -0.205726000 | O | -3.452867000 | -2.927774000 | -1.854597000 |
| H  | 6.234664000  | -4.885148000                      | -2.394621000 | O | -3.209114000 | 5.427756000  | -1.975537000 |
| H  | 6.511547000  | -2.503634000                      | -3.024853000 | O | -4.660045000 | 3.901773000  | -0.618312000 |
| H  | 6.611466000  | -0.150757000                      | -2.285942000 | C | -2.253467000 | 4.453773000  | 0.264280000  |
| H  | 3.406640000  | -0.799129000                      | 0.668878000  | F | -2.309887000 | 3.416920000  | 1.122809000  |
|    |              | <b>N<sub>2</sub>O<sub>2</sub></b> |              | F | -2.644986000 | 5.554943000  | 0.929957000  |
| Fe | 0.245969000  | -0.122136000                      | 0.486663000  | F | -0.965674000 | 4.627038000  | -0.092315000 |
| O  | 1.944923000  | -0.274712000                      | 0.575694000  | S | -3.330173000 | 4.161023000  | -1.223254000 |
| N  | 0.043445000  | -0.495702000                      | 2.639505000  | O | -2.706584000 | 2.978691000  | -1.868431000 |
| N  | 0.132960000  | 0.099092000                       | -1.694582000 | O | 0.046963000  | -2.235841000 | 0.320823000  |
| C  | 0.622506000  | -1.873664000                      | 2.703121000  | C | 5.736299000  | -4.054859000 | -1.253712000 |

|    |              |                       |              |    |              |                      |              |
|----|--------------|-----------------------|--------------|----|--------------|----------------------|--------------|
| C  | 5.806106000  | -2.807323000          | -1.877921000 | H  | -1.143888000 | 0.673279000          | 3.093337000  |
| C  | 5.423832000  | -1.644961000          | -1.200941000 | N  | -1.950645000 | -0.049059000         | 0.553033000  |
| C  | 4.974858000  | -1.741357000          | 0.134962000  | C  | -3.096026000 | -0.036780000         | 0.713826000  |
| C  | 4.908302000  | -3.003394000          | 0.755887000  | C  | -4.530671000 | -0.023023000         | 0.928698000  |
| C  | 5.286111000  | -4.153408000          | 0.069267000  | H  | -4.963454000 | -0.949917000         | 0.532985000  |
| C  | 5.463391000  | -0.295002000          | -1.881628000 | H  | -4.961774000 | 0.854157000          | 0.430634000  |
| C  | 4.566107000  | -0.514575000          | 0.860436000  | H  | -4.731513000 | 0.038455000          | 2.004021000  |
| C  | 5.183361000  | 0.753726000           | 0.403112000  | O  | -5.242536000 | -3.270863000         | 0.082678000  |
| C  | 5.633561000  | 0.868779000           | -0.930844000 | O  | -4.372758000 | -5.378869000         | -0.950095000 |
| C  | 6.214690000  | 2.068412000           | -1.353745000 | C  | -2.900271000 | -4.167700000         | 0.849789000  |
| H  | 6.575059000  | 2.153980000           | -2.376230000 | F  | -1.721796000 | -4.660724000         | 0.421061000  |
| C  | 6.341342000  | 3.149877000           | -0.478993000 | F  | -3.378275000 | -5.005084000         | 1.787449000  |
| C  | 5.891054000  | 3.039574000           | 0.842990000  | F  | -2.655863000 | -2.984267000         | 1.448515000  |
| C  | 5.316412000  | 1.849051000           | 1.278091000  | S  | -4.104715000 | -3.979007000         | -0.555114000 |
| H  | 6.247651000  | -0.277966000          | -2.646881000 | O  | -3.347741000 | -3.174968000         | -1.544277000 |
| H  | 6.039026000  | -4.947545000          | -1.794367000 | O  | -4.649145000 | 5.216733000          | -1.377992000 |
| H  | 6.165372000  | -2.733426000          | -2.901691000 | O  | -5.317759000 | 3.080921000          | -0.257933000 |
| H  | 4.568785000  | -3.068385000          | 1.786975000  | C  | -3.047521000 | 4.199371000          | 0.432803000  |
| H  | 5.238954000  | -5.121387000          | 0.560365000  | F  | -2.696094000 | 3.065875000          | 1.069064000  |
| H  | 3.361615000  | -0.393410000          | 0.679363000  | F  | -3.574468000 | 5.033092000          | 1.347173000  |
| H  | 6.797424000  | 4.073747000           | -0.824298000 | F  | -1.922082000 | 4.770575000          | -0.043436000 |
| H  | 5.996862000  | 3.875777000           | 1.528548000  | S  | -4.254947000 | 3.860667000          | -0.939552000 |
| H  | 4.976395000  | 1.748981000           | 2.306155000  | O  | -3.445214000 | 3.092618000          | -1.916057000 |
| H  | 4.585137000  | -0.633542000          | 1.949100000  | O  | -0.049795000 | 2.028453000          | -0.161587000 |
| H  | 4.516160000  | -0.157057000          | -2.431036000 | O  | -0.504612000 | -0.104109000         | -1.834840000 |
|    |              | <b>NO<sub>3</sub></b> |              | O  | 0.259389000  | -2.115380000         | 0.258021000  |
| Fe | 0.218660000  | -0.029115000          | 0.124745000  | C  | 6.217943000  | 3.645273000          | 0.578693000  |
| O  | 1.857238000  | 0.068246000           | -0.298185000 | C  | 6.404127000  | 2.369657000          | 1.115261000  |
| N  | 0.631685000  | -0.106852000          | 2.226131000  | C  | 5.802562000  | 1.250656000          | 0.529828000  |
| C  | 1.453794000  | -1.357360000          | 2.278442000  | C  | 5.010630000  | 1.420696000          | -0.626601000 |
| H  | 1.641433000  | -1.643601000          | 3.321535000  | C  | 4.828971000  | 2.710523000          | -1.160959000 |
| H  | 2.406641000  | -1.144897000          | 1.793649000  | C  | 5.426858000  | 3.816811000          | -0.564999000 |
| C  | 0.758670000  | -2.523350000          | 1.565287000  | C  | 5.973895000  | -0.127427000         | 1.128598000  |
| H  | -0.105387000 | -2.895918000          | 2.117313000  | C  | 4.363662000  | 0.240311000          | -1.256754000 |
| H  | 1.473815000  | -3.340101000          | 1.439736000  | C  | 5.020196000  | -1.071213000         | -1.017211000 |
| C  | 0.832342000  | -2.796930000          | -0.895709000 | C  | 5.810802000  | -1.257837000         | 0.137546000  |
| H  | 0.741587000  | -3.870345000          | -0.708062000 | C  | 6.421048000  | -2.497738000         | 0.353543000  |
| H  | 1.892248000  | -2.529932000          | -0.968238000 | H  | 7.042694000  | -2.638605000         | 1.234692000  |
| C  | 0.062080000  | -2.441845000          | -2.165637000 | C  | 6.245855000  | -3.548855000         | -0.548992000 |
| H  | 0.447735000  | -3.111336000          | -2.945727000 | C  | 5.457275000  | -3.367324000         | -1.692698000 |
| H  | -0.997921000 | -2.685127000          | -2.028222000 | C  | 4.849979000  | -2.136299000         | -1.922142000 |
| C  | 0.194158000  | -1.022996000          | -2.717308000 | H  | 6.944288000  | -0.203110000         | 1.632403000  |
| H  | 1.239317000  | -0.708930000          | -2.811358000 | H  | 6.694296000  | 4.503094000          | 1.045618000  |
| H  | -0.291334000 | -0.965265000          | -3.696038000 | H  | 7.026802000  | 2.238743000          | 1.997194000  |
| C  | -0.797526000 | 1.241090000           | -2.306212000 | H  | 4.224427000  | 2.831728000          | -2.056717000 |
| H  | -0.621387000 | 1.297886000           | -3.383764000 | H  | 5.287513000  | 4.806831000          | -0.990264000 |
| H  | -1.853416000 | 1.418592000           | -2.096447000 | H  | 3.269181000  | 0.161814000          | -0.786280000 |
| C  | 0.063488000  | 2.270222000           | -1.588808000 | H  | 6.729556000  | -4.504643000         | -0.366310000 |
| H  | -0.310600000 | 3.275269000           | -1.806380000 | H  | 5.326906000  | -4.179910000         | -2.402004000 |
| H  | 1.117468000  | 2.193249000           | -1.875045000 | H  | 4.247681000  | -1.981289000         | -2.814120000 |
| C  | 0.834219000  | 2.851448000           | 0.649847000  | H  | 4.121239000  | 0.404837000          | -2.312718000 |
| H  | 0.495028000  | 3.885218000           | 0.535736000  | H  | 5.222894000  | -0.254465000         | 1.927362000  |
| H  | 1.852454000  | 2.760118000           | 0.255375000  |    |              | <b>O<sub>4</sub></b> |              |
| C  | 0.768243000  | 2.448819000           | 2.122238000  | Fe | -0.176110000 | 0.172641000          | 0.665949000  |
| H  | -0.270175000 | 2.502387000           | 2.465641000  | O  | -1.839661000 | 0.373233000          | 0.641891000  |
| H  | 1.304854000  | 3.239658000           | 2.660923000  | C  | -0.491513000 | 1.554762000          | 3.122866000  |
| C  | 1.435398000  | 1.122401000           | 2.538595000  | H  | -0.260202000 | 1.708300000          | 4.181724000  |
| H  | 2.399229000  | 1.021301000           | 2.036295000  | H  | -1.569405000 | 1.649851000          | 2.958296000  |
| H  | 1.614857000  | 1.138132000           | 3.621206000  | C  | 0.303423000  | 2.540605000          | 2.275350000  |
| C  | -0.516257000 | -0.213913000          | 3.164000000  | H  | 1.361211000  | 2.524730000          | 2.541288000  |
| H  | -0.133835000 | -0.307133000          | 4.188540000  | H  | -0.094618000 | 3.549145000          | 2.410584000  |
| H  | -1.124192000 | -1.085994000          | 2.926534000  | C  | -0.490245000 | 3.040029000          | -0.053960000 |



|    |              |                       |              |   |              |              |              |
|----|--------------|-----------------------|--------------|---|--------------|--------------|--------------|
| H  | 1.845741000  | -1.022902000          | -1.969417000 | N | 0.508311000  | 0.170188000  | -1.857191000 |
| C  | 0.807216000  | -2.337975000          | 1.812075000  | C | 0.643782000  | -2.181350000 | 2.516443000  |
| H  | 0.678913000  | -3.133665000          | 2.559889000  | H | 0.537471000  | -2.670256000 | 3.498921000  |
| H  | 1.534799000  | -1.617718000          | 2.184910000  | H | 1.698996000  | -2.000001000 | 2.317929000  |
| H  | 1.197112000  | -2.784059000          | 0.901129000  | C | 0.080148000  | -3.135686000 | 1.447326000  |
| C  | 0.320231000  | 1.688457000           | 2.702587000  | H | -0.927496000 | -3.445699000 | 1.733945000  |
| H  | 0.037900000  | 2.145136000           | 3.661655000  | H | 0.696816000  | -4.045440000 | 1.440987000  |
| H  | 0.865944000  | 2.419934000           | 2.105422000  | C | 1.165117000  | -2.945022000 | -0.776909000 |
| H  | 0.976051000  | 0.839220000           | 2.893429000  | H | 1.137910000  | -4.036128000 | -0.937837000 |
| N  | 1.648709000  | 0.282275000           | 0.310702000  | H | 2.058631000  | -2.705018000 | -0.200445000 |
| C  | 2.795660000  | 0.386214000           | 0.431992000  | C | 1.266522000  | -2.272684000 | -2.165963000 |
| C  | 4.230762000  | 0.512505000           | 0.599071000  | H | 2.106265000  | -2.780244000 | -2.659828000 |
| H  | 4.588508000  | -0.335193000          | 1.192859000  | H | 0.390738000  | -2.522226000 | -2.774114000 |
| H  | 4.455117000  | 1.467772000           | 1.087632000  | C | 1.590962000  | -0.764793000 | -2.282577000 |
| H  | 4.712297000  | 0.479744000           | -0.382518000 | H | 2.461587000  | -0.542221000 | -1.665567000 |
| O  | 4.542813000  | -2.731212000          | 1.359155000  | H | 1.839716000  | -0.556457000 | -3.337225000 |
| O  | 3.158864000  | -4.286631000          | -0.027840000 | C | 0.947368000  | 1.599466000  | -1.865350000 |
| C  | 5.771845000  | -4.476393000          | -0.171681000 | H | 1.638010000  | 1.788255000  | -2.701695000 |
| F  | 5.715794000  | -5.132806000          | -1.344888000 | H | 0.054301000  | 2.206804000  | -2.030097000 |
| F  | 5.817000000  | -5.392254000          | 0.812819000  | C | 1.600300000  | 2.093923000  | -0.577292000 |
| F  | 6.922981000  | -3.780657000          | -0.142316000 | H | 1.714978000  | 3.183067000  | -0.642783000 |
| S  | 3.549278000  | 4.644413000           | 0.799973000  | H | 2.583010000  | 1.642812000  | -0.407999000 |
| O  | 2.132620000  | 4.229163000           | 0.966413000  | C | 1.168859000  | 2.271600000  | 1.800527000  |
| O  | 4.537506000  | 3.773586000           | 1.482042000  | H | 1.004368000  | 3.356363000  | 1.806907000  |
| O  | 3.795398000  | 6.096917000           | 0.919978000  | H | 2.248220000  | 2.094863000  | 1.914280000  |
| C  | 3.869863000  | 4.308890000           | -0.999134000 | C | 0.397922000  | 1.628844000  | 2.956402000  |
| F  | 5.112183000  | 4.682461000           | -1.348149000 | H | -0.676561000 | 1.764623000  | 2.789507000  |
| F  | 2.999905000  | 4.976017000           | -1.778543000 | H | 0.644484000  | 2.231134000  | 3.840505000  |
| F  | 3.742869000  | 2.994033000           | -1.279699000 | C | 0.722853000  | 0.158582000  | 3.306637000  |
| S  | 4.307575000  | -3.351034000          | 0.031027000  | H | 1.790082000  | -0.021042000 | 3.155018000  |
| O  | 4.428356000  | -2.427757000          | -1.121921000 | H | 0.517867000  | -0.004434000 | 4.376553000  |
| C  | -5.866125000 | -4.242256000          | 0.626175000  | C | -1.403386000 | -0.965956000 | 3.026927000  |
| C  | -6.152799000 | -3.026980000          | 1.255916000  | H | -1.400152000 | -1.369276000 | 4.052564000  |
| C  | -6.110436000 | -1.818797000          | 0.557041000  | H | -2.002614000 | -1.620470000 | 2.393457000  |
| C  | -5.760746000 | -1.827322000          | -0.824146000 | H | -1.881160000 | 0.015049000  | 3.041758000  |
| C  | -5.478309000 | -3.070272000          | -1.450375000 | C | -1.268287000 | -3.012309000 | -0.558012000 |
| C  | -5.530059000 | -4.259384000          | -0.736547000 | H | -1.297592000 | -4.110752000 | -0.640088000 |
| C  | -6.447383000 | -0.520733000          | 1.261202000  | H | -1.376971000 | -2.591283000 | -1.556531000 |
| C  | -5.691250000 | -0.602427000          | -1.552555000 | H | -2.117917000 | -2.682101000 | 0.039652000  |
| C  | -5.957741000 | 0.662675000           | -0.949402000 | C | -0.652028000 | 0.056943000  | -2.766539000 |
| C  | -6.313570000 | 0.737139000           | 0.428215000  | H | -0.364471000 | 0.309283000  | -3.800143000 |
| C  | -6.553554000 | 1.986897000           | 1.002813000  | H | -1.438320000 | 0.741130000  | -2.445512000 |
| H  | -6.824935000 | 2.042070000           | 2.055229000  | H | -1.052552000 | -0.956010000 | -2.759405000 |
| C  | -6.458409000 | 3.163061000           | 0.252205000  | N | -1.917164000 | 0.273637000  | 0.200361000  |
| C  | -6.117200000 | 3.096855000           | -1.107764000 | C | -2.995342000 | 0.697280000  | 0.190048000  |
| C  | -5.870604000 | 1.865772000           | -1.699236000 | C | -4.351649000 | 1.219489000  | 0.187495000  |
| H  | -7.478109000 | -0.583321000          | 1.644244000  | H | -5.010837000 | 0.516591000  | -0.335782000 |
| H  | -5.907321000 | -5.169260000          | 1.191424000  | H | -4.368871000 | 2.199589000  | -0.303823000 |
| H  | -6.418724000 | -3.018718000          | 2.311116000  | H | -4.697015000 | 1.329411000  | 1.221254000  |
| H  | -5.220416000 | -3.075120000          | -2.506954000 | O | 0.734961000  | 1.766154000  | 0.525414000  |
| H  | -5.313082000 | -5.201453000          | -1.233341000 | O | -6.262913000 | -1.339107000 | -1.000209000 |
| H  | -3.001526000 | -0.173806000          | -0.703352000 | O | -6.897605000 | -3.753304000 | -0.856001000 |
| H  | -6.652362000 | 4.123532000           | 0.721743000  | C | -5.287866000 | -2.773915000 | 0.963459000  |
| H  | -6.048543000 | 4.006979000           | -1.697865000 | F | -4.801178000 | -3.979095000 | 1.308847000  |
| H  | -5.608445000 | 1.805492000           | -2.753122000 | F | -6.313583000 | -2.490490000 | 1.784549000  |
| H  | -5.436284000 | -0.635355000          | -2.609141000 | F | -4.315682000 | -1.861946000 | 1.198495000  |
| H  | -5.825761000 | -0.426044000          | 2.163803000  | S | -5.817335000 | -2.743087000 | -0.816725000 |
|    |              | <b>N<sub>3</sub>O</b> |              | O | -4.577822000 | -3.110167000 | -1.539396000 |
| Fe | 0.315454000  | -0.367817000          | 0.329468000  | O | -2.361686000 | 5.927661000  | -2.125484000 |
| O  | 2.275086000  | -0.632207000          | 0.604309000  | O | -4.067054000 | 4.411136000  | -1.095580000 |
| N  | -0.026995000 | -0.852794000          | 2.510104000  | C | -1.752851000 | 4.688994000  | 0.104131000  |
| N  | -0.006505000 | -2.561065000          | 0.065153000  | F | -2.001112000 | 3.599920000  | 0.856730000  |

|    |              |                                   |              |   |              |                       |              |
|----|--------------|-----------------------------------|--------------|---|--------------|-----------------------|--------------|
| F  | -2.125477000 | 5.768564000                       | 0.814910000  | C | 0.697266000  | 0.755029000           | 3.356559000  |
| F  | -0.420234000 | 4.763936000                       | -0.086137000 | H | 1.751511000  | 0.570859000           | 3.138601000  |
| S  | -2.658722000 | 4.612685000                       | -1.517370000 | H | 0.576397000  | 0.728435000           | 4.450948000  |
| O  | -2.041113000 | 3.447025000                       | -2.195259000 | C | -1.430031000 | -0.412489000          | 3.363870000  |
| C  | 5.682793000  | 1.904823000                       | 2.550702000  | H | -1.355364000 | -0.629843000          | 4.441263000  |
| C  | 5.230240000  | 0.620664000                       | 2.316025000  | H | -2.037923000 | -1.184056000          | 2.890073000  |
| C  | 5.483346000  | -0.006069000                      | 1.065771000  | H | -1.940978000 | 0.542823000           | 3.234882000  |
| C  | 6.207105000  | 0.683736000                       | 0.051289000  | C | -1.073203000 | -0.246843000          | -2.448144000 |
| C  | 6.647791000  | 1.982792000                       | 0.309361000  | H | -0.879083000 | -0.259827000          | -3.532705000 |
| C  | 6.389545000  | 2.584670000                       | 1.540649000  | H | -1.834069000 | 0.505601000           | -2.240113000 |
| C  | 5.035330000  | -1.326701000                      | 0.827232000  | H | -1.466156000 | -1.218787000          | -2.147374000 |
| C  | 6.474816000  | 0.026181000                       | -1.269477000 | N | -2.081040000 | 0.178791000           | 0.431292000  |
| C  | 6.079107000  | -1.415055000                      | -1.390116000 | C | -3.221533000 | 0.374390000           | 0.392106000  |
| C  | 5.352818000  | -2.053085000                      | -0.342982000 | C | -4.654310000 | 0.610010000           | 0.343966000  |
| C  | 4.973719000  | -3.417480000                      | -0.462759000 | H | -5.138884000 | -0.228367000          | -0.170656000 |
| H  | 4.427707000  | -3.883180000                      | 0.352187000  | H | -4.851277000 | 1.550943000           | -0.183787000 |
| C  | 5.306966000  | -4.131097000                      | -1.597582000 | H | -5.044944000 | 0.679927000           | 1.364948000  |
| C  | 6.019035000  | -3.493340000                      | -2.631057000 | O | 0.467407000  | 2.013748000           | 0.400441000  |
| C  | 6.399487000  | -2.155191000                      | -2.528855000 | O | -5.665498000 | -2.447757000          | -0.864705000 |
| H  | 4.494058000  | -1.836454000                      | 1.617010000  | O | -5.102995000 | -4.843773000          | -1.313457000 |
| H  | 5.499313000  | 2.388361000                       | 3.504965000  | C | -4.020723000 | -3.674009000          | 0.767249000  |
| H  | 4.686695000  | 0.070362000                       | 3.078690000  | F | -2.965233000 | -4.507953000          | 0.839741000  |
| H  | 7.200569000  | 2.523185000                       | -0.453962000 | F | -4.988577000 | -4.165349000          | 1.560650000  |
| H  | 6.745283000  | 3.594576000                       | 1.724200000  | F | -3.636099000 | -2.486464000          | 1.281472000  |
| H  | 5.949124000  | 0.596046000                       | -2.053460000 | S | -4.612905000 | -3.487212000          | -0.984817000 |
| H  | 5.026243000  | -5.174954000                      | -1.694931000 | O | -3.391283000 | -3.062852000          | -1.707515000 |
| H  | 6.282023000  | -4.054166000                      | -3.523562000 | O | -3.336745000 | 5.494646000           | -2.220275000 |
| H  | 6.953010000  | -1.685016000                      | -3.336760000 | O | -4.748842000 | 3.788347000           | -1.052502000 |
| H  | 7.537836000  | 0.137543000                       | -1.525680000 | C | -2.457978000 | 4.469020000           | 0.027407000  |
| H  | 2.652232000  | 0.088619000                       | 1.128673000  | F | -2.528986000 | 3.401018000           | 0.845265000  |
|    |              | <b>N<sub>2</sub>O<sub>2</sub></b> |              | F | -2.948619000 | 5.527162000           | 0.698133000  |
| Fe | 0.183211000  | -0.112704000                      | 0.529301000  | F | -1.156608000 | 4.711108000           | -0.225326000 |
| O  | 2.144764000  | -0.287457000                      | 0.747071000  | S | -3.405396000 | 4.179854000           | -1.546195000 |
| N  | -0.087452000 | -0.361570000                      | 2.754301000  | O | -2.643899000 | 3.091221000           | -2.205765000 |
| N  | 0.163470000  | 0.078914000                       | -1.700477000 | O | 0.080263000  | -2.265783000          | 0.542635000  |
| C  | 0.590290000  | -1.679842000                      | 2.899777000  | C | 5.744680000  | -3.653058000          | -2.236693000 |
| H  | 0.478598000  | -2.074510000                      | 3.922776000  | C | 6.077064000  | -2.314771000          | -2.447637000 |
| H  | 1.647756000  | -1.521896000                      | 2.688292000  | C | 5.837587000  | -1.363119000          | -1.455766000 |
| C  | 0.045253000  | -2.725933000                      | 1.916457000  | C | 5.242453000  | -1.787417000          | -0.231708000 |
| H  | -0.999480000 | -2.972916000                      | 2.119962000  | C | 4.912419000  | -3.155790000          | -0.032294000 |
| H  | 0.634155000  | -3.644900000                      | 2.010477000  | C | 5.163965000  | -4.079991000          | -1.027353000 |
| C  | 1.141501000  | -2.805488000                      | -0.285680000 | C | 6.184606000  | 0.079637000           | -1.670298000 |
| H  | 1.061225000  | -3.899360000                      | -0.257506000 | C | 4.998833000  | -0.841071000          | 0.788294000  |
| H  | 2.101718000  | -2.497760000                      | 0.133641000  | C | 5.391575000  | 0.514536000           | 0.700617000  |
| C  | 1.007557000  | -2.341970000                      | -1.739679000 | C | 5.988244000  | 0.996377000           | -0.500264000 |
| H  | 1.771934000  | -2.910936000                      | -2.286237000 | C | 6.374639000  | 2.336060000           | -0.564645000 |
| H  | 0.044981000  | -2.680887000                      | -2.137204000 | H | 6.830859000  | 2.720120000           | -1.472697000 |
| C  | 1.256516000  | -0.858089000                      | -2.093615000 | C | 6.184956000  | 3.178888000           | 0.530237000  |
| H  | 2.167100000  | -0.519793000                      | -1.597451000 | C | 5.603731000  | 2.706890000           | 1.722634000  |
| H  | 1.399431000  | -0.789085000                      | -3.184717000 | C | 5.207384000  | 1.386360000           | 1.808325000  |
| C  | 0.510224000  | 1.511858000                       | -1.956391000 | H | 7.223022000  | 0.156534000           | -2.023314000 |
| H  | 1.126310000  | 1.609450000                       | -2.862946000 | H | 5.942106000  | -4.379454000          | -3.019923000 |
| H  | -0.428340000 | 2.041674000                       | -2.133031000 | H | 6.529501000  | -2.009596000          | -3.386977000 |
| C  | 1.223961000  | 2.226301000                       | -0.807855000 | H | 4.468012000  | -3.455710000          | 0.912081000  |
| H  | 1.260785000  | 3.299338000                       | -1.033636000 | H | 4.918975000  | -5.127299000          | -0.882347000 |
| H  | 2.246150000  | 1.862202000                       | -0.660581000 | H | 2.565991000  | 0.546012000           | 0.999429000  |
| C  | 0.976128000  | 2.681705000                       | 1.571078000  | H | 6.496445000  | 4.217368000           | 0.462241000  |
| H  | 0.773962000  | 3.754146000                       | 1.461314000  | H | 5.472630000  | 3.377890000           | 2.565550000  |
| H  | 2.065990000  | 2.546966000                       | 1.621495000  | H | 4.760633000  | 0.992770000           | 2.716804000  |
| C  | 0.307819000  | 2.164499000                       | 2.849011000  | H | 4.546574000  | -1.186401000          | 1.712241000  |
| H  | -0.778541000 | 2.258979000                       | 2.742398000  | H | 5.586816000  | 0.459488000           | -2.515021000 |
| H  | 0.596406000  | 2.876479000                       | 3.633153000  |   |              | <b>NO<sub>3</sub></b> |              |

|    |              |              |              |    |              |              |              |
|----|--------------|--------------|--------------|----|--------------|--------------|--------------|
| Fe | 0.210453000  | 0.092210000  | -0.080145000 | C  | 5.654597000  | 4.130535000  | 0.160150000  |
| O  | 2.055411000  | 0.399369000  | -0.689920000 | C  | 6.066359000  | 2.998046000  | 0.862325000  |
| N  | 0.785814000  | -0.119507000 | 2.037333000  | C  | 5.747556000  | 1.721389000  | 0.395851000  |
| C  | 1.784179000  | -1.213209000 | 1.875001000  | C  | 4.989669000  | 1.602010000  | -0.802895000 |
| H  | 2.151513000  | -1.566627000 | 2.851520000  | C  | 4.579991000  | 2.764847000  | -1.507827000 |
| H  | 2.618062000  | -0.798790000 | 1.308350000  | C  | 4.911752000  | 4.018570000  | -1.029850000 |
| C  | 1.220811000  | -2.417220000 | 1.102224000  | C  | 6.177115000  | 0.495968000  | 1.147466000  |
| H  | 0.489591000  | -2.979676000 | 1.688268000  | C  | 4.669668000  | 0.315000000  | -1.303730000 |
| H  | 2.047731000  | -3.088929000 | 0.850453000  | C  | 5.174906000  | -0.879589000 | -0.734818000 |
| C  | 1.060928000  | -2.485261000 | -1.365571000 | C  | 5.935931000  | -0.819330000 | 0.467251000  |
| H  | 1.092904000  | -3.579544000 | -1.310749000 | C  | 6.439318000  | -2.006737000 | 1.001087000  |
| H  | 2.076748000  | -2.103220000 | -1.506316000 | H  | 7.022221000  | -1.978715000 | 1.917458000  |
| C  | 0.150883000  | -2.078344000 | -2.530060000 | C  | 6.207697000  | -3.223853000 | 0.360053000  |
| H  | 0.506353000  | -2.656541000 | -3.393884000 | C  | 5.467233000  | -3.288328000 | -0.834682000 |
| H  | -0.871575000 | -2.417021000 | -2.324998000 | C  | 4.953022000  | -2.126272000 | -1.377868000 |
| C  | 0.124559000  | -0.612602000 | -2.983055000 | H  | 7.238459000  | 0.582006000  | 1.417872000  |
| H  | 1.135882000  | -0.198182000 | -3.053826000 | H  | 5.917652000  | 5.115195000  | 0.536227000  |
| H  | -0.365620000 | -0.547791000 | -3.961704000 | H  | 6.645003000  | 3.106412000  | 1.775467000  |
| C  | -1.009920000 | 1.523590000  | -2.380659000 | H  | 4.012162000  | 2.648265000  | -2.426713000 |
| H  | -0.872973000 | 1.698726000  | -3.453091000 | H  | 4.607350000  | 4.911300000  | -1.566974000 |
| H  | -2.069264000 | 1.627006000  | -2.133535000 | H  | 2.221633000  | 1.338678000  | -0.859026000 |
| C  | -0.203627000 | 2.556179000  | -1.590914000 | H  | 6.613466000  | -4.136204000 | 0.788011000  |
| H  | -0.668956000 | 3.541409000  | -1.715841000 | H  | 5.305602000  | -4.243765000 | -1.323703000 |
| H  | 0.836506000  | 2.608750000  | -1.935617000 | H  | 4.381586000  | -2.144963000 | -2.301098000 |
| C  | 0.510803000  | 3.022919000  | 0.700562000  | H  | 4.111858000  | 0.247289000  | -2.230454000 |
| H  | 0.018391000  | 4.002010000  | 0.726167000  | H  | 5.651175000  | 0.484510000  | 2.116737000  |
| H  | 1.529692000  | 3.160553000  | 0.312486000  |    |              |              |              |
| C  | 0.537628000  | 2.430247000  | 2.114187000  |    |              |              |              |
| H  | -0.493474000 | 2.257803000  | 2.441695000  | Fe | 0.280415000  | 0.299450000  | -0.151847000 |
| H  | 0.926453000  | 3.232791000  | 2.754317000  | O  | 2.192434000  | 0.511842000  | -0.076313000 |
| C  | 1.422536000  | 1.187682000  | 2.376833000  | C  | 0.549010000  | 1.052906000  | 2.609522000  |
| H  | 2.335799000  | 1.266264000  | 1.782614000  | H  | 0.280479000  | 1.601935000  | 3.521462000  |
| H  | 1.712559000  | 1.179920000  | 3.439045000  | H  | 1.640551000  | 1.048055000  | 2.506848000  |
| C  | -0.219861000 | -0.486054000 | 3.052567000  | C  | -0.005488000 | -0.370019000 | 2.705357000  |
| H  | 0.259334000  | -0.641539000 | 4.031732000  | H  | -1.073775000 | -0.341544000 | 2.939975000  |
| H  | -0.736720000 | -1.402475000 | 2.762100000  | H  | 0.517116000  | -0.910347000 | 3.501102000  |
| H  | -0.966295000 | 0.303916000  | 3.148785000  | C  | 1.058792000  | -2.170865000 | 1.347915000  |
| N  | -1.997356000 | -0.188256000 | 0.493054000  | H  | 0.854024000  | -2.878189000 | 2.160030000  |
| C  | -3.120420000 | -0.343442000 | 0.727339000  | H  | 2.078424000  | -1.785796000 | 1.471352000  |
| C  | -4.529071000 | -0.538318000 | 1.027953000  | C  | 0.894145000  | -2.894688000 | 0.004506000  |
| H  | -4.867318000 | -1.482740000 | 0.586532000  | H  | 1.513157000  | -3.798758000 | 0.083649000  |
| H  | -5.102865000 | 0.305705000  | 0.627545000  | H  | -0.143306000 | -3.234545000 | -0.102675000 |
| H  | -4.665457000 | -0.582012000 | 2.113903000  | C  | 1.334414000  | -2.197646000 | -1.291109000 |
| O  | -4.824695000 | -3.944302000 | 0.139180000  | H  | 2.306111000  | -1.708803000 | -1.170862000 |
| O  | -3.685970000 | -5.894996000 | -0.939397000 | H  | 1.391203000  | -2.942116000 | -2.094200000 |
| C  | -2.338998000 | -4.462130000 | 0.793213000  | C  | 0.511399000  | -0.543078000 | -2.953046000 |
| F  | -1.121111000 | -4.775909000 | 0.309629000  | H  | 1.151196000  | -1.139770000 | -3.612050000 |
| F  | -2.640963000 | -5.355551000 | 1.753192000  | H  | -0.491995000 | -0.493815000 | -3.386975000 |
| F  | -2.248976000 | -3.251409000 | 1.379442000  | C  | 1.092773000  | 0.865267000  | -2.820521000 |
| S  | -3.621445000 | -4.468080000 | -0.553301000 | H  | 1.042311000  | 1.364938000  | -3.796778000 |
| O  | -3.044933000 | -3.562370000 | -1.574322000 | H  | 2.128887000  | 0.835001000  | -2.470666000 |
| O  | -5.401632000 | 4.876026000  | -0.861305000 | C  | 0.817480000  | 2.894837000  | -1.492675000 |
| O  | -5.643293000 | 2.602764000  | 0.155187000  | H  | 0.660421000  | 3.564635000  | -2.347419000 |
| C  | -3.474060000 | 3.982048000  | 0.677365000  | H  | 1.892422000  | 2.804053000  | -1.302384000 |
| F  | -2.902551000 | 2.871395000  | 1.177753000  | C  | 0.089337000  | 3.458753000  | -0.264129000 |
| F  | -3.993517000 | 4.673744000  | 1.708002000  | H  | -0.992964000 | 3.341211000  | -0.385830000 |
| F  | -2.498744000 | 4.735780000  | 0.128499000  | H  | 0.277233000  | 4.540716000  | -0.280184000 |
| S  | -4.781268000 | 3.563583000  | -0.576607000 | C  | 0.525174000  | 2.991043000  | 1.131841000  |
| O  | -3.999341000 | 2.981184000  | -1.693238000 | H  | 1.617956000  | 2.931031000  | 1.195904000  |
| O  | -0.230707000 | 2.177284000  | -0.201788000 | H  | 0.163637000  | 3.705141000  | 1.882120000  |
| O  | -0.650701000 | 0.165505000  | -2.044400000 | N  | -1.979627000 | 0.213130000  | -0.289846000 |
| O  | 0.547473000  | -1.992149000 | -0.106974000 | C  | -3.135589000 | 0.193911000  | -0.222491000 |
|    |              |              |              | C  | -4.585458000 | 0.178967000  | -0.139449000 |

**O<sub>4</sub>**

|   |              |              |              |
|---|--------------|--------------|--------------|
| H | -4.961766000 | -0.658046000 | -0.735871000 |
| H | -4.984151000 | 1.134357000  | -0.499788000 |
| H | -4.884364000 | 0.031986000  | 0.903200000  |
| O | -4.452245000 | -2.980240000 | -1.344557000 |
| O | -2.453335000 | -4.292052000 | -0.605089000 |
| C | -4.833579000 | -5.136236000 | 0.100618000  |
| F | -4.334021000 | -5.888711000 | 1.098602000  |
| F | -4.945167000 | -5.918343000 | -0.988957000 |
| F | -6.072097000 | -4.749347000 | 0.457820000  |
| S | -4.395740000 | 4.388011000  | -0.638480000 |
| O | -3.237473000 | 4.063224000  | -1.503959000 |
| O | -5.513628000 | 3.412754000  | -0.693819000 |
| O | -4.802933000 | 5.810330000  | -0.631883000 |
| C | -3.721711000 | 4.139520000  | 1.075383000  |
| F | -4.637129000 | 4.452797000  | 2.009152000  |
| F | -2.635678000 | 4.908470000  | 1.288807000  |
| F | -3.355910000 | 2.856990000  | 1.275343000  |
| S | -3.746822000 | -3.668028000 | -0.235606000 |
| O | -3.753338000 | -2.945131000 | 1.057399000  |
| C | 5.375914000  | -4.064015000 | -0.061060000 |
| C | 5.669682000  | -3.022501000 | -0.941931000 |
| C | 5.951932000  | -1.746493000 | -0.454496000 |
| C | 5.933190000  | -1.536137000 | 0.957664000  |
| C | 5.632189000  | -2.610012000 | 1.841265000  |
| C | 5.355391000  | -3.862950000 | 1.333228000  |
| C | 6.264150000  | -0.613905000 | -1.383904000 |
| C | 6.213799000  | -0.253539000 | 1.468664000  |
| C | 6.520948000  | 0.861589000  | 0.665410000  |
| C | 6.557378000  | 0.713437000  | -0.754622000 |
| C | 6.866831000  | 1.828037000  | -1.533315000 |
| H | 6.900666000  | 1.736162000  | -2.615091000 |
| C | 7.132725000  | 3.057206000  | -0.929113000 |
| C | 7.096702000  | 3.210637000  | 0.470812000  |
| C | 6.793427000  | 2.123356000  | 1.264049000  |
| H | 7.111370000  | -0.901128000 | -2.025793000 |
| H | 5.160010000  | -5.051047000 | -0.460225000 |
| H | 5.680458000  | -3.204397000 | -2.012796000 |
| H | 5.627257000  | -2.421569000 | 2.910895000  |
| H | 5.125331000  | -4.689893000 | 1.997182000  |
| H | 2.627058000  | 0.187154000  | 0.724831000  |
| H | 7.372629000  | 3.913855000  | -1.552603000 |
| H | 7.307013000  | 4.177581000  | 0.916330000  |
| H | 6.757973000  | 2.208215000  | 2.346201000  |
| H | 6.191068000  | -0.116362000 | 2.548182000  |
| H | 5.426788000  | -0.494164000 | -2.089164000 |
| O | -0.029882000 | 1.694243000  | 1.456619000  |
| O | 0.300318000  | 1.591306000  | -1.855078000 |
| O | 0.349285000  | -1.206373000 | -1.677879000 |
| O | 0.109227000  | -1.084162000 | 1.452216000  |
